# Supplementary material
Source: PubMed Central journal article supplement (PMC6784889)
Supplement: 41586_2018_620_MOESM2_ESM.pdf [file 41586_2018_620_MOESM2_ESM.pdf]

## Reporting Summary

Nature Research wishes to improve the reproducibility of the work that we publish. This form provides structure for consistency and transparency in reporting. For further information on Nature Research policies, see [Authors & Referees](#) and the [Editorial Policy Checklist](#).

### Statistical parameters

When statistical analyses are reported, confirm that the following items are present in the relevant location (e.g. figure legend, table legend, main text, or Methods section).

n/a Confirmed

- The exact sample size ( $n$ ) for each experimental group/condition, given as a discrete number and unit of measurement
- An indication of whether measurements were taken from distinct samples or whether the same sample was measured repeatedly
- The statistical test(s) used AND whether they are one- or two-sided  
*Only common tests should be described solely by name; describe more complex techniques in the Methods section.*
- A description of all covariates tested
- A description of any assumptions or corrections, such as tests of normality and adjustment for multiple comparisons
- A full description of the statistics including central tendency (e.g. means) or other basic estimates (e.g. regression coefficient) AND variation (e.g. standard deviation) or associated estimates of uncertainty (e.g. confidence intervals)
- For null hypothesis testing, the test statistic (e.g.  $F$ ,  $t$ ,  $r$ ) with confidence intervals, effect sizes, degrees of freedom and  $P$  value noted  
*Give  $P$  values as exact values whenever suitable.*
- For Bayesian analysis, information on the choice of priors and Markov chain Monte Carlo settings
- For hierarchical and complex designs, identification of the appropriate level for tests and full reporting of outcomes
- Estimates of effect sizes (e.g. Cohen's  $d$ , Pearson's  $r$ ), indicating how they were calculated
- Clearly defined error bars  
*State explicitly what error bars represent (e.g. SD, SE, CI)*

*Our web collection on [statistics for biologists](#) may be useful.*

### Software and code

Policy information about [availability of computer code](#)

|                 |                                                                                                                                                                                                                                  |
|-----------------|----------------------------------------------------------------------------------------------------------------------------------------------------------------------------------------------------------------------------------|
| Data collection | No software was used for data collection.                                                                                                                                                                                        |
| Data analysis   | Bowtie2 v2.2.3, Casava v1.8.2 (Illumina), cutadapt v1.9dev2, Trim Galore v0.2.8 (Babraham Bioinformatics), PRINSEQ v0.20.3, MetaPhlan2 v2.6.0, HUMAnN2 v0.9.4, R v3.1.1, Python v2.7.1. Additional details are given in Methods. |

For manuscripts utilizing custom algorithms or software that are central to the research but not yet described in published literature, software must be made available to editors/reviewers upon request. We strongly encourage code deposition in a community repository (e.g. GitHub). See the Nature Research [guidelines for submitting code & software](#) for further information.

### Data

Policy information about [availability of data](#)

All manuscripts must include a [data availability statement](#). This statement should provide the following information, where applicable:

- Accession codes, unique identifiers, or web links for publicly available datasets
- A list of figures that have associated raw data
- A description of any restrictions on data availability

TEDDY Microbiome 16S and WGS data that support the findings of this study are available in NCBI's database of Genotypes and Phenotypes (dbGaP) with the

## Field-specific reporting

Please select the best fit for your research. If you are not sure, read the appropriate sections before making your selection.

Life sciences  Behavioural & social sciences  Ecological, evolutionary & environmental sciences

For a reference copy of the document with all sections, see [nature.com/authors/policies/ReportingSummary-flat.pdf](https://www.nature.com/authors/policies/ReportingSummary-flat.pdf)

## Life sciences study design

All studies must disclose on these points even when the disclosure is negative.

|                 |                                                                                                                                                                                                                                                                                                                                                    |
|-----------------|----------------------------------------------------------------------------------------------------------------------------------------------------------------------------------------------------------------------------------------------------------------------------------------------------------------------------------------------------|
| Sample size     | All stool samples with metagenomic data (N = 10,903 stool samples) from subjects in TEDDY islet autoimmunity and type 1 diabetes case-control cohorts are being analyzed for maximal power. This includes all subjects with islet autoimmunity or type 1 diabetes and their matched controls in TEDDY study as of May 31, 2012 (N = 783 subjects). |
| Data exclusions | In T1D and IA case-control comparisons, all case-control pairs where the control later progressed to case status were removed (i.e. they progressed to IA or T1D).                                                                                                                                                                                 |
| Replication     | For bacterial growth assays, the experiment was reproduced 3x with technical replicates in triplicate.                                                                                                                                                                                                                                             |
| Randomization   | Randomization was not used.                                                                                                                                                                                                                                                                                                                        |
| Blinding        | No blinding was used, TEDDY is an observational follow-up study.                                                                                                                                                                                                                                                                                   |

## Reporting for specific materials, systems and methods

### Materials & experimental systems

| n/a                                 | Included in the study                                           |
|-------------------------------------|-----------------------------------------------------------------|
| <input type="checkbox"/>            | <input checked="" type="checkbox"/> Unique biological materials |
| <input checked="" type="checkbox"/> | <input type="checkbox"/> Antibodies                             |
| <input checked="" type="checkbox"/> | <input type="checkbox"/> Eukaryotic cell lines                  |
| <input checked="" type="checkbox"/> | <input type="checkbox"/> Palaeontology                          |
| <input checked="" type="checkbox"/> | <input type="checkbox"/> Animals and other organisms            |
| <input type="checkbox"/>            | <input checked="" type="checkbox"/> Human research participants |

### Methods

| n/a                                 | Included in the study                           |
|-------------------------------------|-------------------------------------------------|
| <input checked="" type="checkbox"/> | <input type="checkbox"/> ChIP-seq               |
| <input checked="" type="checkbox"/> | <input type="checkbox"/> Flow cytometry         |
| <input checked="" type="checkbox"/> | <input type="checkbox"/> MRI-based neuroimaging |

## Unique biological materials

Policy information about [availability of materials](#)

Obtaining unique materials The bacterial strains isolated for and used in this study will be provided to anyone who requests them.

## Human research participants

Policy information about [studies involving human research participants](#)

|                            |                                                                                                                                                                                                                                                                                                                                                                                                                                                                     |
|----------------------------|---------------------------------------------------------------------------------------------------------------------------------------------------------------------------------------------------------------------------------------------------------------------------------------------------------------------------------------------------------------------------------------------------------------------------------------------------------------------|
| Population characteristics | This study includes metagenomic profiles of stool samples from children collected monthly starting at three months of age to up to five years of age. The study population are 783 mostly white, non-hispanic children from six different clinical centers in the U.S. (Colorado, Georgia/Florida, and Washington) and Europe (Finland, Germany, and Sweden). The whole study population had a genetic predisposition for T1D or first-degree relative(s) with T1D. |
| Recruitment                | Families with a newborn in participating clinical centers with HLA-conferred genetic predisposition for T1D or first-degree relative(s) with T1D were invited to join the study.                                                                                                                                                                                                                                                                                    |
